# Supplementary material
Source: PubMed Central journal article supplement (PMC6328325)
Supplement: NIHMS1508051-supplement-1.pdf [file NIHMS1508051-supplement-1.pdf]

## **SUPPLEMENTAL FIGURES & TABLE FOR:**

### **Spatiotemporal loss of *NF1* in Schwann cell lineage leads to different types of cutaneous neurofibroma susceptible to modification by the Hippo pathway**

Zhiguo Chen<sup>1</sup>, Juan Mo<sup>1,#</sup>, Jean-Philippe Brosseau<sup>1,#</sup>, Tracey Shipman<sup>1</sup>, Yong Wang<sup>1</sup>, Chung-Ping Liao<sup>1</sup>, Jonathan M. Cooper<sup>1</sup>, Robert J. Allaway<sup>2</sup>, Sara J.C. Gosline<sup>2</sup>, Justin Guinney<sup>2</sup>, Thomas J. Carroll<sup>3,5,6</sup>, and Lu Q. Le<sup>1,4,5,6,\*</sup>

<sup>1</sup> Department of Dermatology, University of Texas Southwestern Medical Center, Dallas, TX 75390, USA, <sup>2</sup> Sage Bionetworks, Seattle, WA, 98121, USA, <sup>3</sup> Department of Molecular Biology, <sup>4</sup> Neurofibromatosis Clinic, <sup>5</sup> Simmons Comprehensive Cancer Center, <sup>6</sup> Hamon Center for Regenerative Science and Medicine, University of Texas Southwestern Medical Center, Dallas, TX 75390, USA.

# These authors contributed equally

\* Corresponding Author Contact information:

Lu Q Le, M.D., Ph.D.  
Associate Professor  
Department of Dermatology  
Simmons Comprehensive Cancer Center  
Hamon Center for Regenerative Science and Medicine  
University of Texas Southwestern Medical Center  
5323 Harry Hines Blvd  
Dallas, TX 75390-9069  
Telephone: 214-648-5781  
Fax: 214-648-5553  
E-mail: [Lu.Le@utsouthwestern.edu](mailto:Lu.Le@utsouthwestern.edu)

Running Title: Developmental origin of cutaneous neurofibroma

Keywords: Neurofibromatosis Type 1, NF1, Dermal Neurofibroma, Cutaneous Neurofibroma, Peripheral Nerve Sheath Tumor, Plexiform Neurofibroma, Schwann Cells, Tumor Cells of Origin, Tumor Microenvironment, Neurofibromin, Hippo pathway, Hoxb7

The authors declare no potential conflicts of interest

# Supplemental Figure 1

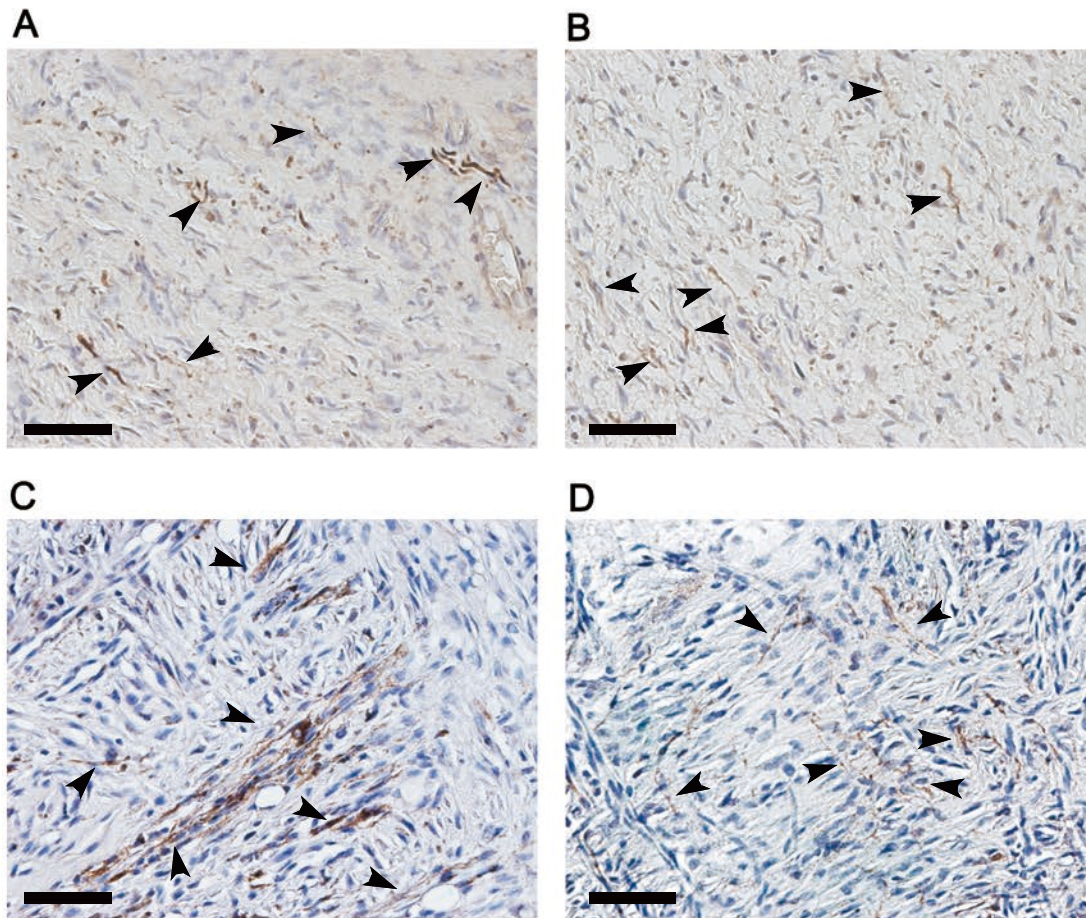

Supplemental Figure 1. The expression of beta-III-Tubulin in human and mouse cNF. (A and B) The expression of beta-III-Tubulin (neuron marker) in human cNF. (C and D) The expression of beta-III-Tubulin in mouse cNF. Arrow head = nerve fiber. Scale bar = 50 $\mu$ m.

## Supplemental Figure 2

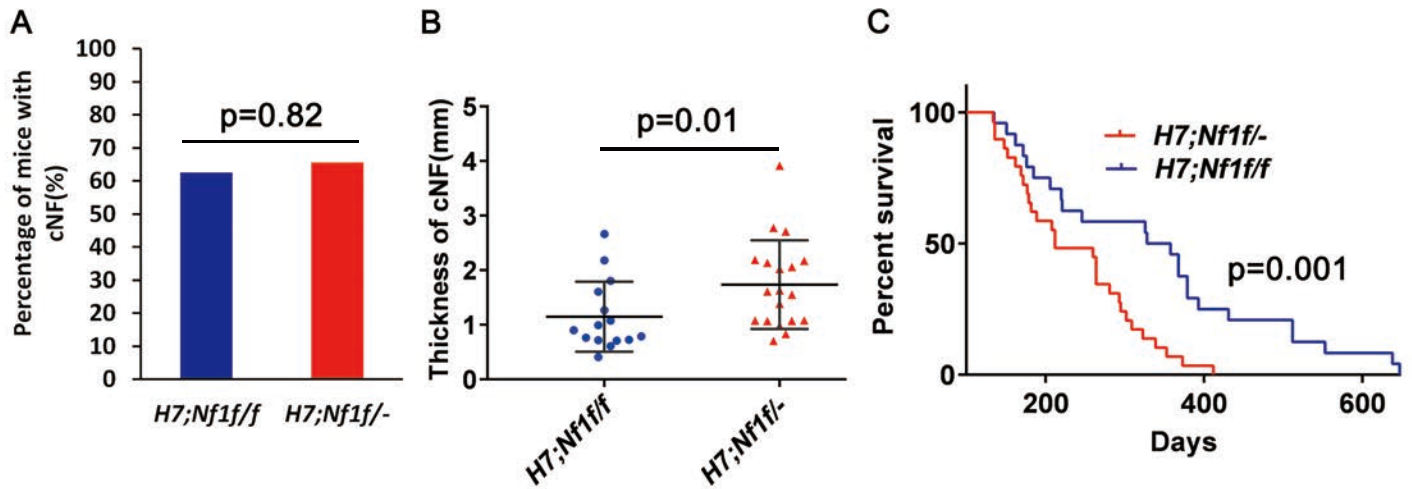

Supplemental Figure 2. Prevalance of cNF and survival analysis of *H7;Nf1f/f* and *H7;Nf1f/-* in both of *H7;Nf1mut* and *H7;Nf1mut;Lats1/2mut* mice.

(A). Percentage of mice with cNF in *H7;Nf1f/f* and *H7;Nf1f/-*. 15 of 24 (62.5%) mice developed cNF in *H7;Nf1f/f*, and 19 of 29 (65.5%) mice developed cNF in *H7;Nf1f/-*. (B). Thickness of cNF developed in *H7;Nf1f/f* and *H7;Nf1f/-* mice. (C). Survival analysis in *H7;Nf1f/f* and *H7;Nf1f/-* mice.

### Supplemental Figure 3

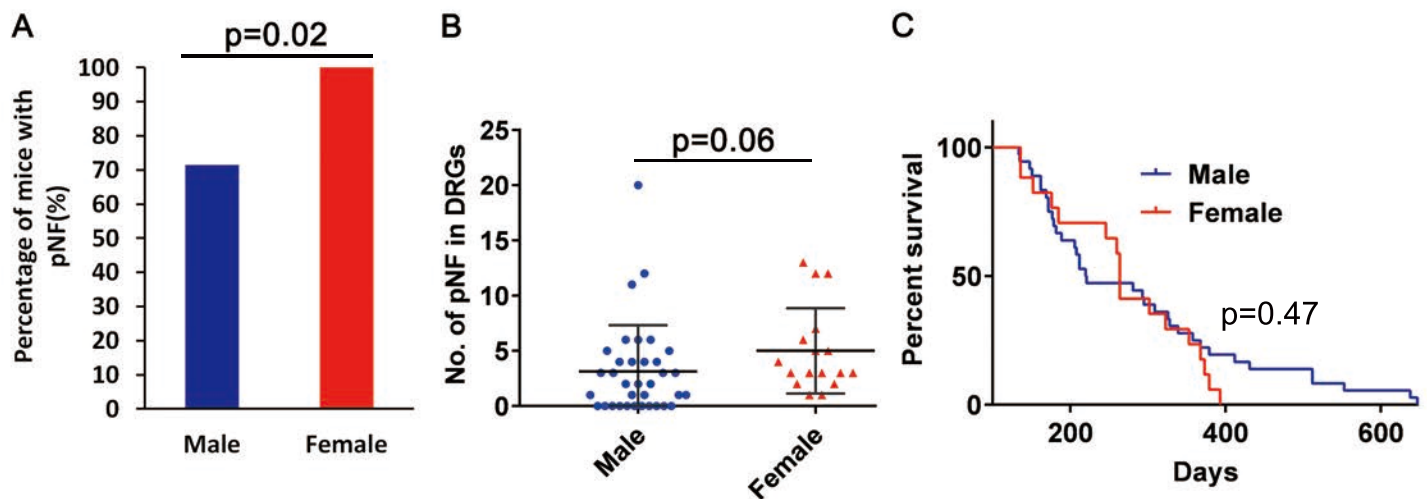

Supplemental Figure 3. Prevalance of pNF and survival analysis of male and female in both of *H7;Nf1mut* and *H7;Nf1mut;Lats1/2mut* mice.

(A). Percentage of mice with pNF in male and female. 25 of 35 (71.4%) mice developed pNF in male, and 17 of 17 (100%) mice developed pNF in female. (B). No. of pNF developed in DRGs in male and female mice. (C). Survival analysis in male and female mice.



**Supplemental Table 1. Genotype and phenotype of *H7;Nf1mut* and control mice**

| Sex                                                                             | Life Span (days) | pNF No. in DRG | SN Thk (mm) L | SN Thk (mm) R | cNF (Y:Yes; N:No) | cNF Thk (mm) | Location of cNF | Sex                                                                              | Life Span (days) | pNF No. in DRG | SN Thk (mm) L | SN Thk (mm) R | cNF (Y:Yes; N:No) | cNF Thk (mm) | Location of cNF |
|---------------------------------------------------------------------------------|------------------|----------------|---------------|---------------|-------------------|--------------|-----------------|----------------------------------------------------------------------------------|------------------|----------------|---------------|---------------|-------------------|--------------|-----------------|
| <b>Genotype: <i>Hoxb7-Cre;Nf1<sup>-/-</sup></i></b>                             |                  |                |               |               |                   |              |                 | <b>Genotype: <i>Hoxb7-Cre;Nf1mut;Lats1<sup>f/+</sup>;Lats2<sup>f/+</sup></i></b> |                  |                |               |               |                   |              |                 |
| F                                                                               | 264              | 1              | 0.5           | 0.5           | N                 | N/A          | N/A             | M                                                                                | 151              | 1              | 0.6           | 0.9           | N                 | N/A          | N/A             |
| F                                                                               | 264              | 3              | 0.6           | 0.6           | N                 | N/A          | N/A             | F                                                                                | 152              | 12             | 1.2           | 1.2           | Y                 | 1.08         | H&N, U          |
| F                                                                               | 264              | 3              | 0.7           | 0.5           | N                 | N/A          | N/A             | M                                                                                | 162              | 1              | 0.6           | 0.6           | Y                 | 0.73         | H&N, U,B        |
| M                                                                               | 212              | 4              | 0.7           | 0.6           | Y                 | 0.71         | H&N             | M                                                                                | 179              | 3              | 0.5           | 0.5           | Y                 | 2.02         | H&N             |
| M                                                                               | 212              | 3              | 0.6           | 0.6           | N                 | N/A          | N/A             | M                                                                                | 182              | 1              | 0.9           | 0.8           | Y                 | 2.19         | H&N             |
| M                                                                               | 169              | 0              | 0.5           | 0.6           | Y                 | 1.55         | H&N             | M                                                                                | 208              | 6              | 1.6           | 1.4           | Y                 | 1.39         | H&N             |
| F                                                                               | 136              | 1              | 0.6           | 0.6           | Y                 | 1.08         | H&N             | M                                                                                | 221              | 12             | 1             | 1             | Y                 | 0.79         | H&N, U          |
| F                                                                               | 136              | 4              | 0.6           | 0.6           | Y                 | 0.98         | H&N,U           | M                                                                                | 281              | 1              | 0.6           | 0.6           | N                 | N/A          | N/A             |
| M                                                                               | 309              | 0              | 0.7           | 0.7           | Y                 | 0.83         | H&N             | M                                                                                | 293              | 0              | 0.6           | 0.7           | Y                 | 3.91         | H&N             |
| <b>Genotype: <i>Hoxb7-Cre;Nf1<sup>ff</sup></i></b>                              |                  |                |               |               |                   |              |                 | F                                                                                | 323              | 13             | 0.7           | 0.8           | N                 | N/A          | N/A             |
| F                                                                               | 185              | 3              | 0.6           | 0.5           | Y                 | 1.81         | H&N             | M                                                                                | 328              | 20             | 0.7           | 0.7           | N                 | N/A          | N/A             |
| M                                                                               | 688              | 0              | 0.6           | 0.5           | Y                 | 0.76         | U               | F                                                                                | 353              | 5              | 2             | 0.8           | N                 | N/A          | N/A             |
| F                                                                               | 393              | 6              | 0.5           | 0.5           | N                 | N/A          | N/A             | F                                                                                | 379              | 2              | 0.7           | 0.7           | N                 | N/A          | N/A             |
| M                                                                               | 638              | 5              | 0.5           | 0.5           | Y                 | 1.08         | H&N,U           | M                                                                                | 412              | 6              | 0.9           | 1             | Y                 | 2.71         | H&N, U          |
| M                                                                               | 553              | 0              | 0.6           | 0.6           | N                 | N/A          | N/A             | M                                                                                | 206              | 0              | 0.7           | 0.6           | Y                 | 2.66         | H&N, U,B        |
| M                                                                               | 135              | N.A.           | N.A.          | N.A.          | Y                 | 2.18         | H&N             | <b>Genotype: <i>Hoxb7-Cre;Lats1<sup>ff</sup>;Lats2<sup>+/+ a</sup></i></b>       |                  |                |               |               |                   |              |                 |
| M                                                                               | 431              | 1              | 0.6           | 0.5           | Y                 | 0.71         | H&N             | F                                                                                | 522              | 0              | 0.6           | 0.5           | N                 | N/A          | N/A             |
| M                                                                               | 220              | 0              | 0.7           | 0.6           | Y                 | 0.41         | H&N,U           | F                                                                                | 489              | 0              | 0.6           | 0.6           | N                 | N/A          | N/A             |
| F                                                                               | 246              | 2              | 0.5           | 0.5           | Y                 | 1.61         | H&N,U           | M                                                                                | 647              | 0              | 0.8           | 0.7           | N                 | N/A          | N/A             |
| M                                                                               | 512              | 0              | 0.6           | 0.6           | Y                 | 0.72         | H&N,U           | M                                                                                | 647              | 0              | 0.6           | 0.6           | N                 | N/A          | N/A             |
| M                                                                               | 512              | 4              | 0.5           | 0.6           | N                 | N/A          | N/A             | M                                                                                | 647              | 0              | 0.5           | 0.5           | N                 | N/A          | N/A             |
| M                                                                               | 379              | 0              | 0.6           | 0.6           | Y                 | 0.90         | H&N             | M                                                                                | 647              | 0              | 0.6           | 0.7           | N                 | N/A          | N/A             |
| M                                                                               | 358              | 5              | 0.6           | 0.5           | N                 | N/A          | N/A             | M                                                                                | 544              | 0              | 0.6           | 0.6           | N                 | N/A          | N/A             |
| F                                                                               | 368              | 3              | 0.7           | 0.5           | Y                 | 0.99         | H&N,U           | M                                                                                | 544              | 0              | 0.6           | 0.5           | N                 | N/A          | N/A             |
| M                                                                               | 368              | 3              | 0.7           | 0.6           | N                 | N/A          | N/A             | <b>Genotype: <i>Hoxb7-Cre;Lats1<sup>+/+</sup>;Lats2<sup>ff a</sup></i></b>       |                  |                |               |               |                   |              |                 |
| M                                                                               | 326              | 0              | 0.6           | 0.6           | Y                 | 0.61         | H&N             | M                                                                                | 534              | 0              | 0.6           | 0.6           | N                 | N/A          | N/A             |
| <b>Genotype: <i>Hoxb7-Cre;Nf1mut;Lats1<sup>ff</sup>;Lats2<sup>+/+</sup></i></b> |                  |                |               |               |                   |              |                 | F                                                                                | 579              | 0              | 0.6           | 0.6           | N                 | N/A          | N/A             |
| M                                                                               | 134              | 6              | 0.8           | 0.8           | N                 | N/A          | N/A             | M                                                                                | 579              | 0              | 0.6           | 0.7           | N                 | N/A          | N/A             |
| F                                                                               | 176              | 3              | 0.5           | 0.5           | N                 | N/A          | N/A             | M                                                                                | 424              | 0              | 0.6           | 0.7           | N                 | N/A          | N/A             |
| M                                                                               | 177              | 2              | 0.7           | 0.6           | Y                 | 1.07         | H&N             | M                                                                                | 390              | 0              | 0.8           | 0.6           | N                 | N/A          | N/A             |
| M                                                                               | 189              | 2              | 1.4           | 1.5           | Y                 | 1.07         | H&N             | M                                                                                | 390              | 0              | 0.6           | 0.6           | N                 | N/A          | N/A             |
| M                                                                               | 295              | 3              | 0.9           | 0.6           | Y                 | 2.06         | H&N, U          | F                                                                                | 390              | 0              | 0.6           | 0.7           | N                 | N/A          | N/A             |
| <b>Genotype: <i>Hoxb7-Cre;Nf1mut;Lats1<sup>+/+</sup>;Lats2<sup>ff</sup></i></b> |                  |                |               |               |                   |              |                 | F                                                                                | 390              | 0              | 0.6           | 0.6           | N                 | N/A          | N/A             |
| M                                                                               | 148              | 4              | 1.5           | 1.2           | Y                 | 2.78         | H&N, U          | M                                                                                | 341              | 0              | 0.6           | 0.7           | N                 | N/A          | N/A             |
| M                                                                               | 162              | 0              | 0.7           | 0.7           | Y                 | 2.14         | H&N, U,B        | F                                                                                | 357              | 0              | 0.7           | 0.8           | N                 | N/A          | N/A             |
| M                                                                               | 172              | 4              | 0.9           | 0.8           | Y                 | 1.27         | H&N             | <b>Genotype: <i>Hoxb7-Cre;Lats1<sup>f/+</sup>;Lats2<sup>f/+ a</sup></i></b>      |                  |                |               |               |                   |              |                 |
| M                                                                               | 172              | 11             | 1.6           | 1.9           | Y                 | 1.61         | H&N             | M                                                                                | 534              | 0              | 0.6           | 0.6           | N                 | N/A          | N/A             |
| F                                                                               | 260              | 7              | 0.6           | 0.5           | N                 | N/A          | N/A             | M                                                                                | 534              | 0              | 0.6           | 0.6           | N                 | N/A          | N/A             |
| M                                                                               | 339              | 2              | 0.5           | 0.5           | N                 | N/A          | N/A             | F                                                                                | 288              | 0              | 0.6           | 0.6           | N                 | N/A          | N/A             |
| F                                                                               | 373              | 12             | 0.8           | 0.7           | Y                 | 2.17         | U               | F                                                                                | 288              | 0              | 0.6           | 0.6           | N                 | N/A          | N/A             |
| F                                                                               | 302              | 5              | 0.9           | 0.7           | Y                 | 1.63         | H&N, U          | F                                                                                | 288              | 0              | 0.6           | 0.6           | N                 | N/A          | N/A             |

## Supplemental Table legend

### Supplemental Table 1. Genotype and phenotype of *H7;Nf1mut* and control mice

Summaries of the sex, life span, number of para-spinal pNF, sciatic nerve thickness, presence of cNF, cNF thickness, location of cNF and genotypes.

F: Female. M: Male. No.: Number. SN: Sciatic Nerve. Thk: Thickness. mm: Millimeter. L: Left; R: right. N/A: Not applicable. N.A., Not Available. H&N: Head and Neck. U: Upper back. B: Bottom back. <sup>a</sup>: at end of study, mice look normal and none of the mice show any sign of skin lesion or paralysis. Bold and italic: mice genotype.
